# Supplementary material for: Role and Diagnostic Performance of Host Epigenome in Respiratory Morbidity after RSV Infection: The EPIRESVi Study
Source: PubMed Central journal article supplement (PMC9128527; doi:10.3389/fimmu.2022.875691), 2022-05-10

**A**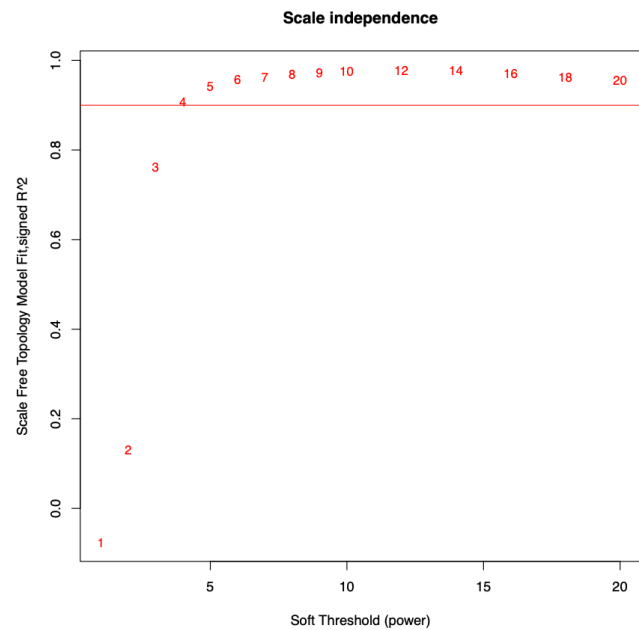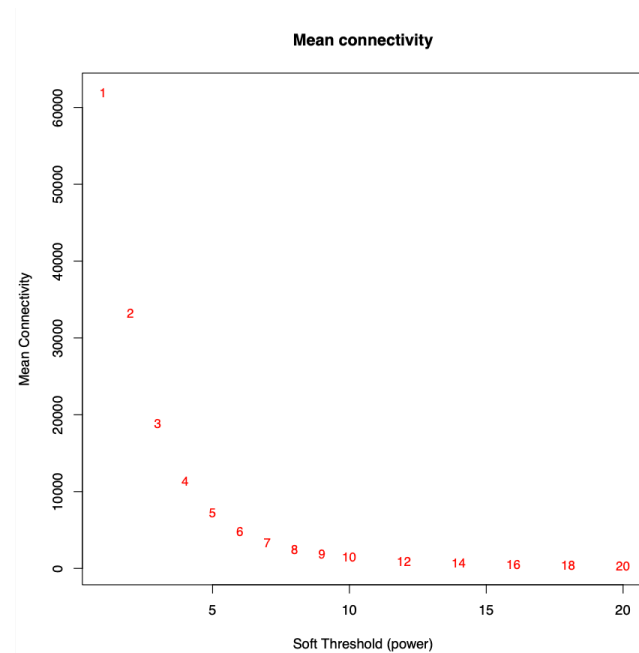**B**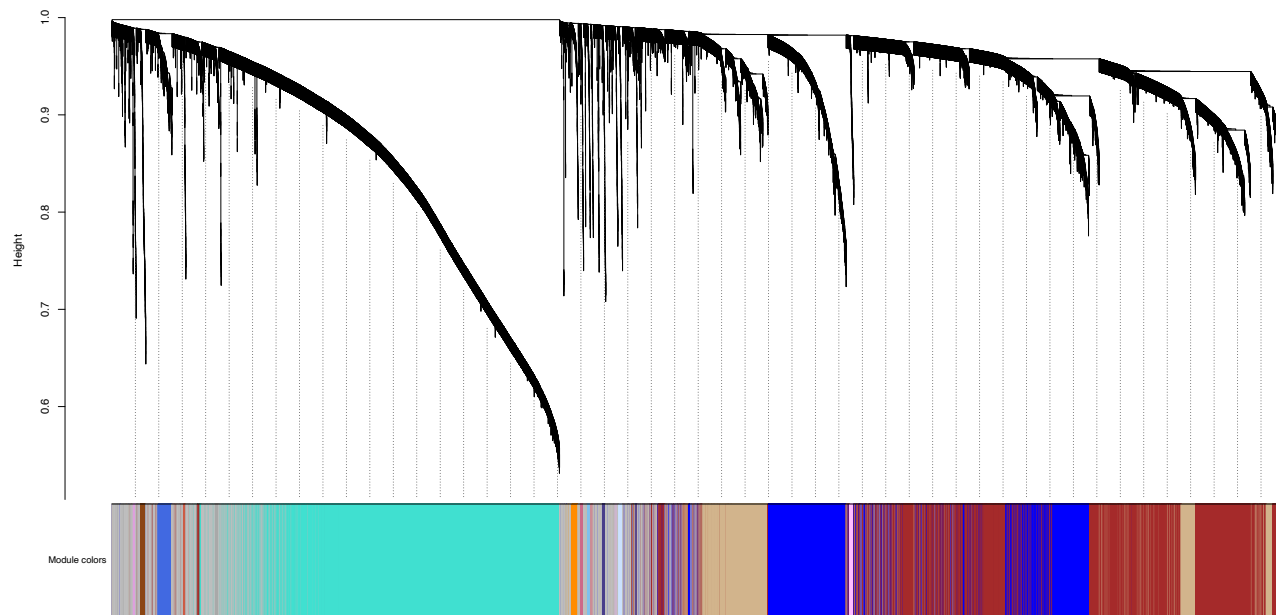**C**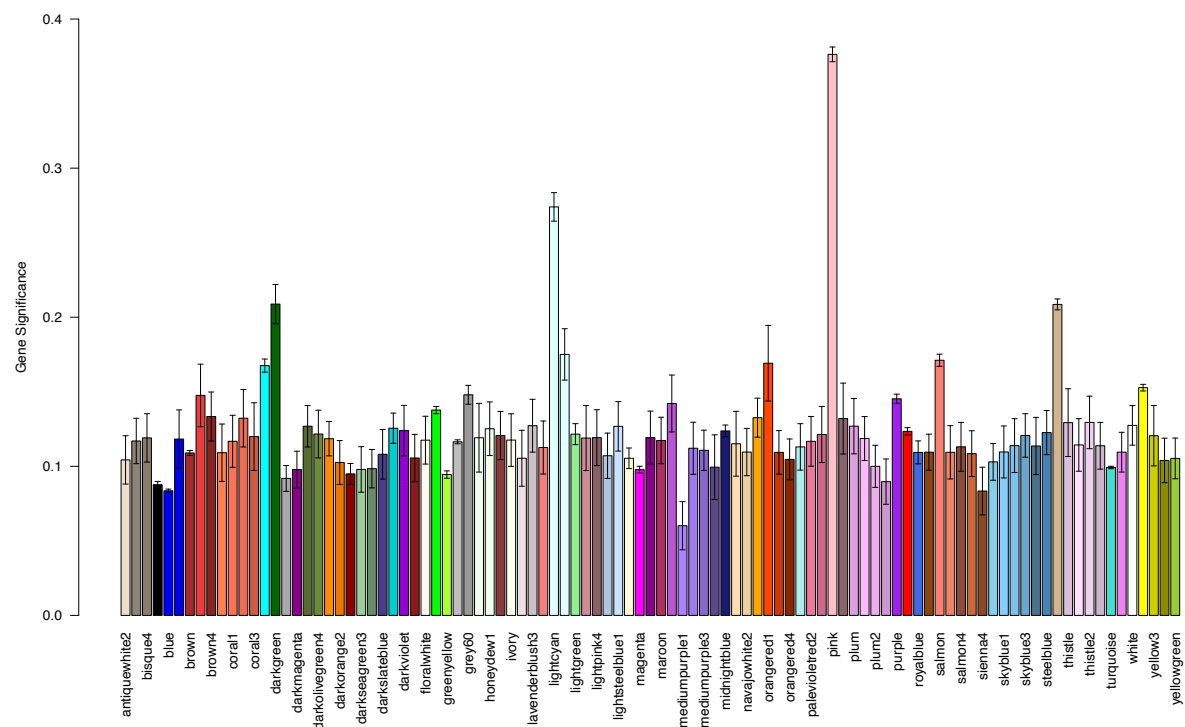

Supplement: Image_1.pdf [file Image_1.pdf]
